# Supplementary material for: A competitive reaction strategy toward dielectric phases for enhancing electromagnetic wave absorption of polymer-derived ceramics
Source: Royal Society of Chemistry journal article supplement (doi:10.1039/d4ta02449d), 2024-01-01
Supplement: d4ta02449d1.pdf [file d4ta02449d1.pdf]

# A competitive reaction strategy toward dielectric phases for enhancing electromagnetic wave absorption of polymer-derived ceramics

Shuhao Hu, Pingan Chen\*, Xiangcheng Li\*\*, Yingli Zhu, Boquan Zhu

The State Key Laboratory of Refractories and Metallurgy

Key Laboratory of High Temperature Electromagnetic Materials and Structure of

MOE

Wuhan University of Science and Technology, Wuhan 430081, PR China

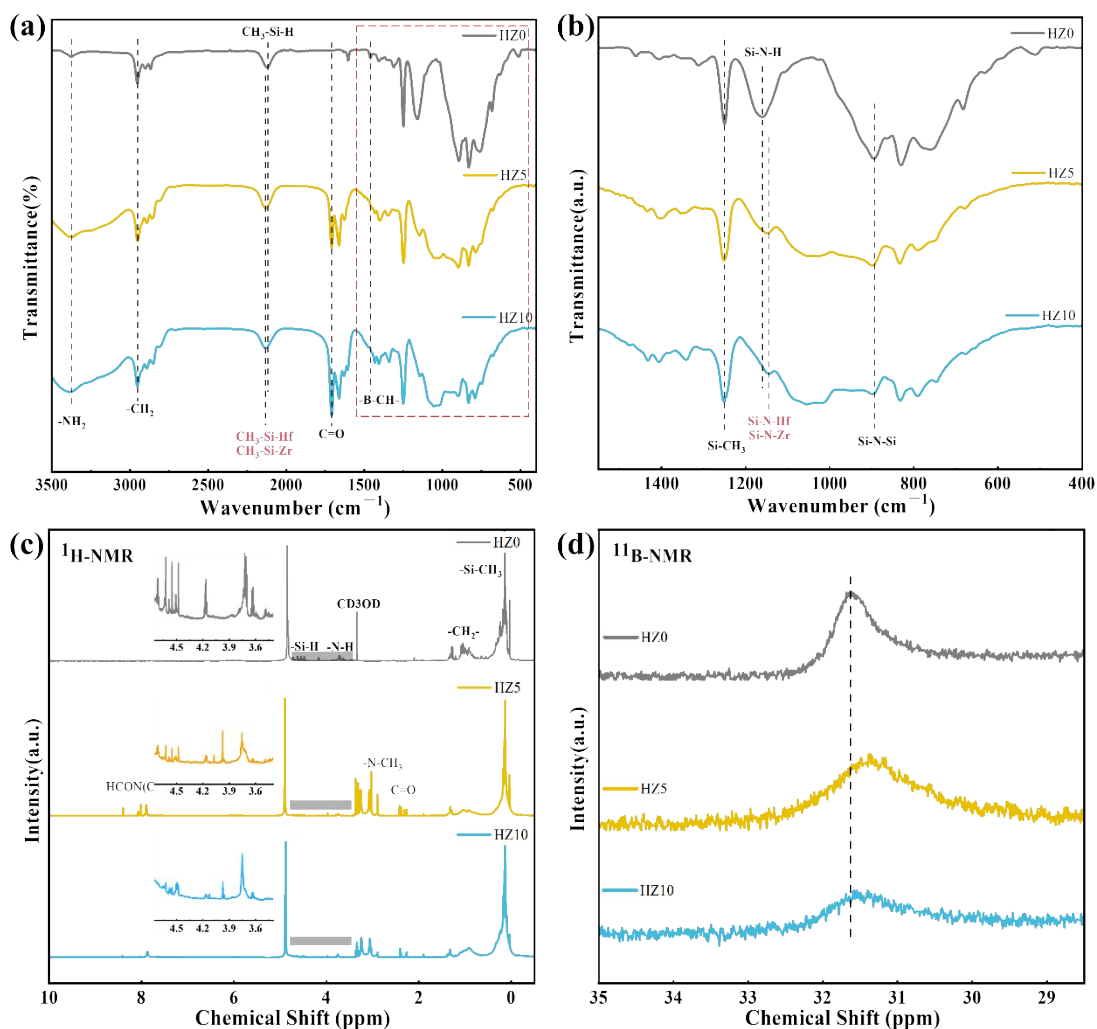

Fig. S1 Structural characterization of HfZr-PBSZ. (a, b) FT-IR spectra, (c)  $^1\text{H-NMR}$  spectra, (d)  $^{11}\text{B-NMR}$  spectra

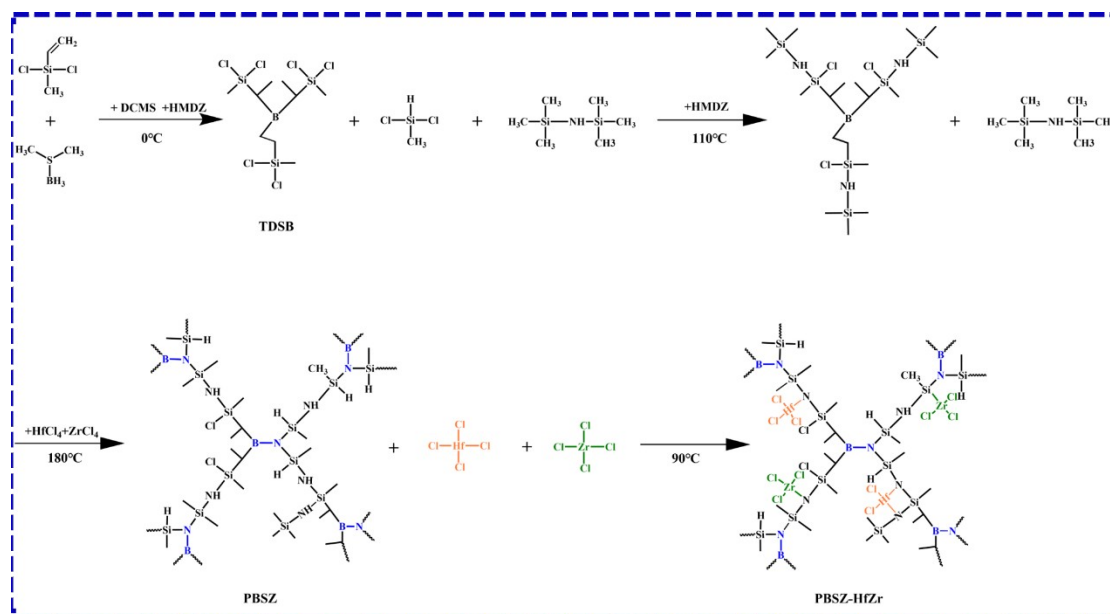

Fig. S2 Synthesis route for HfZr-PBSZ

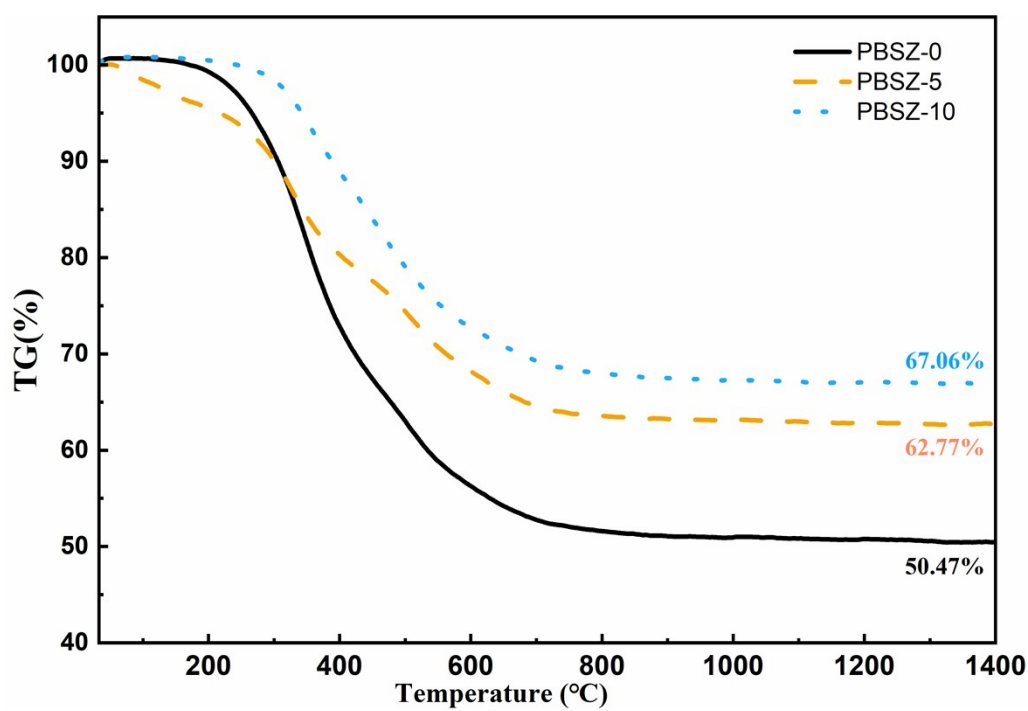

Fig. S3 TG curves of HfZr-PBSZ

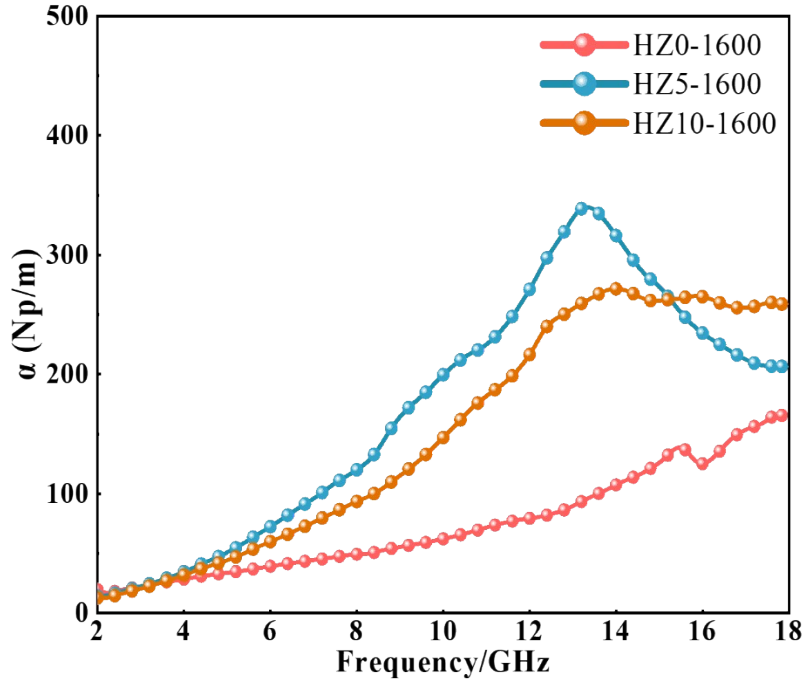

Fig. S4 Microwave attenuation constant curves of the SiHfZrBCN ceramics
